# Supplementary material for: Spaced Training Forms Complementary Long-Term Memories of Opposite Valence in Drosophila
Source: PubMed Central journal article supplement (PMC7302427; doi:10.1016/j.neuron.2020.03.013), 2020-06-17
Supplement: mmc1.pdf [file mmc1.pdf]

**Neuron, Volume 106**

**Supplemental Information**

**Spaced Training Forms Complementary Long-Term  
Memories of Opposite Valence in *Drosophila***

**Pedro F. Jacob and Scott Waddell**

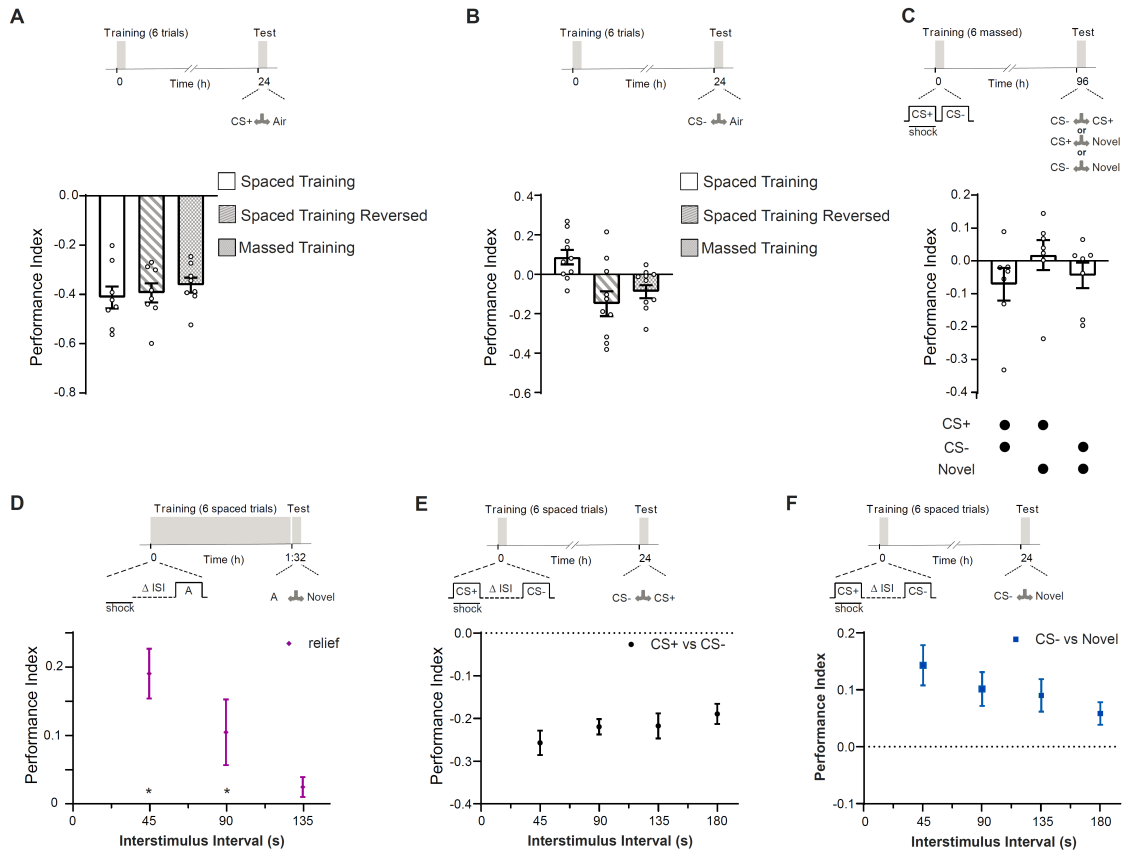

**Figure S1. Related to Figure 1.**

**Spaced training forms CS+ aversive memory and CS- approach memory.**

(A) Spaced, reversed spaced and massed training generated a similar 24 h CS+ aversive memory when flies were tested CS+ vs. Air. (B) A 24 h CS- approach memory (CS- vs. Air), was only measurable following spaced training spaced. After reversed spaced and massed training flies avoided the CS- odor. (C) Massed training did not generate measurable 96 h memory. (D) Spaced relief training (6 trials, shock then odor A training, with 15 min ITI) generated approach memory to odor A, when measured immediately after training. Relief memory to odor A was not formed when ISI was increased from 45 to 135 s. Varying ISI between CS+ and CS- in spaced training produced similar 24 h LTM (E) and CS- approach memory (F). Asterisks denote significant difference. Data mean  $\pm$  SEM. Individual data points displayed as dots. See Table S1 for statistics.

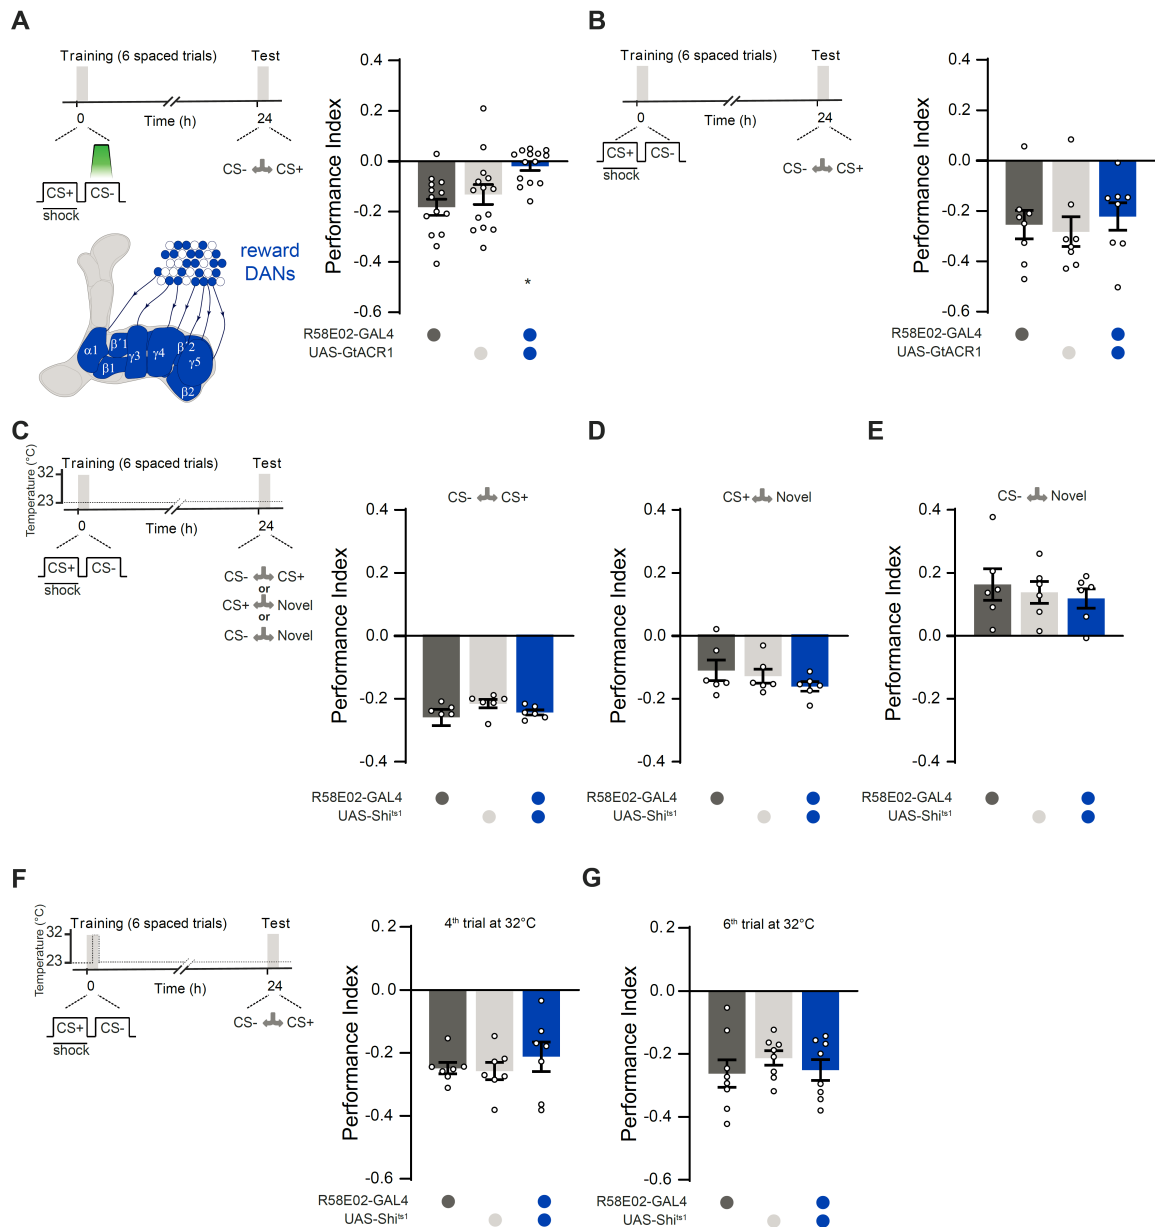

**Figure S2. Related to Figure 2.**

**CS- approach memory requires PAM DANs during CS- presentation.**

(A) Left: protocol with green light exposure during CS- presentation and PAM/R58E02-GAL4 DAN schematic. Right: Blocking PAM DANs with R58E02-GAL4; UAS-GtACR1 during CS- impaired 24 h memory. (B) Left: protocol without green light. Right: UAS-GtACR1 expression in PAM DANs (R58E02-GAL4) does not disrupt 24 h memory after spaced training. (C) Left: protocol. Right: Expressing UAS-Shi<sup>ts1</sup> in R58E02-GAL4 DANs does not disrupt 24 h memory after spaced training at permissive 23°C. (D) CS+ aversive memory is unaffected. (E) CS- approach memory is unaffected. (F) Left: protocol with temperature shifting, dashed line. Right: Blocking DANs with R58E02-GAL4; UAS-Shi<sup>ts1</sup>, only during the 4<sup>th</sup> trial or (G) only the 6<sup>th</sup> trial did not alter 24 h memory. Asterisks denote significant differences. Data mean  $\pm$  SEM. Individual data points displayed as dots. See Table S1 for statistics.

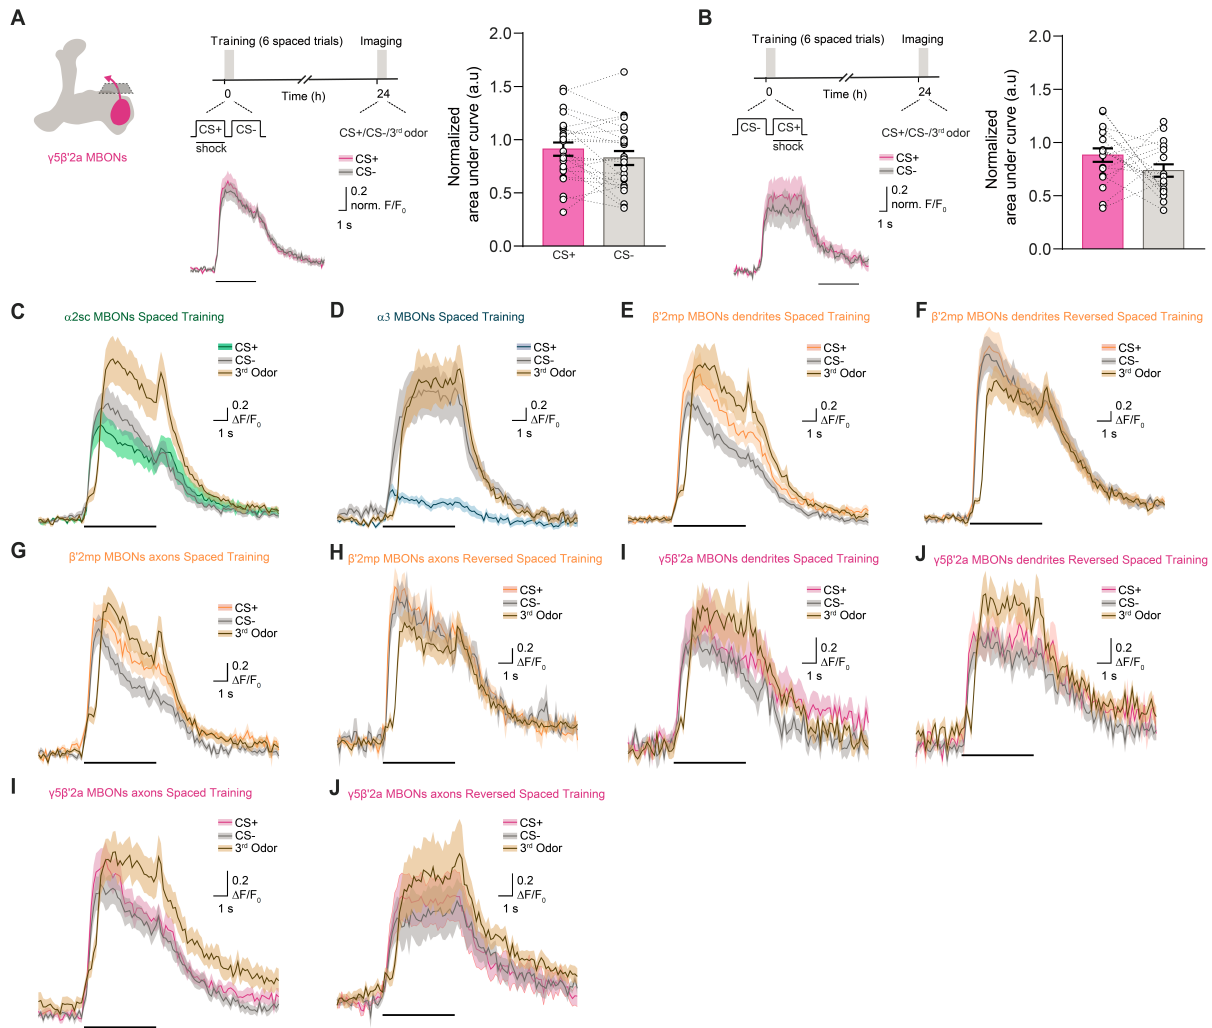

**Figure S3. Related to Figure 3.**

**Parallel aversive and safety memories can be recorded as depression of odor-specific responses in corresponding MBONs.**

Odor responses in MBON- $\gamma 5\beta'2a$  are unchanged following spaced training. Imaging plane in presynaptic terminals of MBON- $\gamma 5\beta'2a$  and training and imaging protocols. **(A)** Spaced training and **(B)** reversed spaced training do not change odor-evoked responses in MBON- $\gamma 5\beta'2a$ . **(C-J)** Non-normalized imaging traces for the MBON recordings reported in Figure 3 and S3A and B, in the order depicted in each figure. Odor-evoked activity traces show mean (solid line) with SEM (shadow). Black line underneath, 5 s odor. Asterisks denote significant difference between averaged CS+ and CS- responses. See Table S1 for statistics.

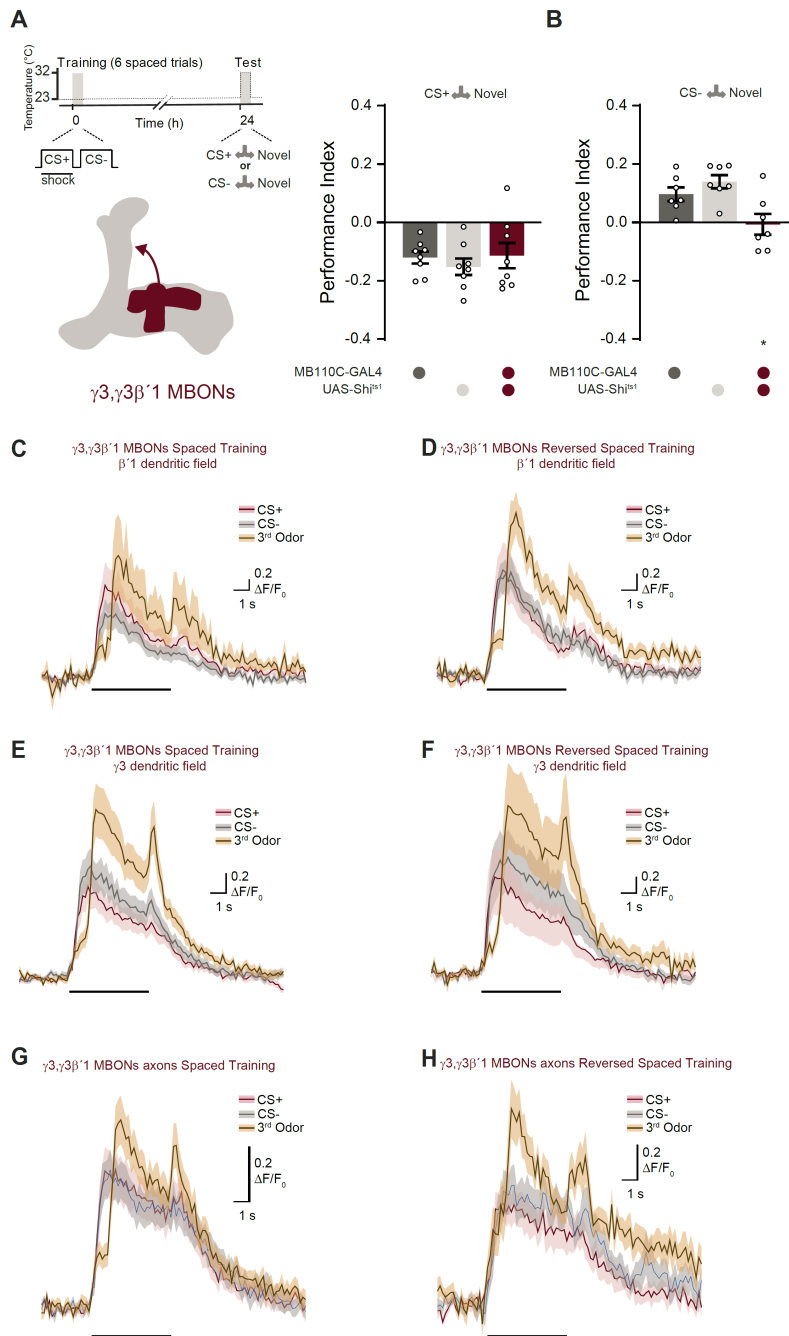

**Figure S4. Related to Figure 4.**

**Output from  $\gamma3, \gamma3\beta'1$  MBONs is required for expression of CS- approach memory.**

(A) Left: protocol with temperature shifting (dashed line) and illustration of  $\gamma3, \gamma3\beta'1$  MBONs. Right: blocking  $\gamma3, \gamma3\beta'1$  MBONs during testing with MB110C-GAL4/UAS-Shi<sup>ts1</sup> did not impair CS+ aversive memory (CS+ vs. Novel). (B) Blocking  $\gamma3, \gamma3\beta'1$  MBONs during testing impaired CS- approach memory. (C-H) Non-normalized imaging traces for the recordings of  $\gamma3, \gamma3\beta'1$  MBON responses reported in Figure 4, in the order they are depicted in the figure. Odor-evoked activity traces show mean (solid line) with SEM (shadow). Black line underneath, 5 s odor. Asterisks denote significant difference. Data mean  $\pm$  SEM. Individual data points displayed as dots. See Table S1 for statistics.

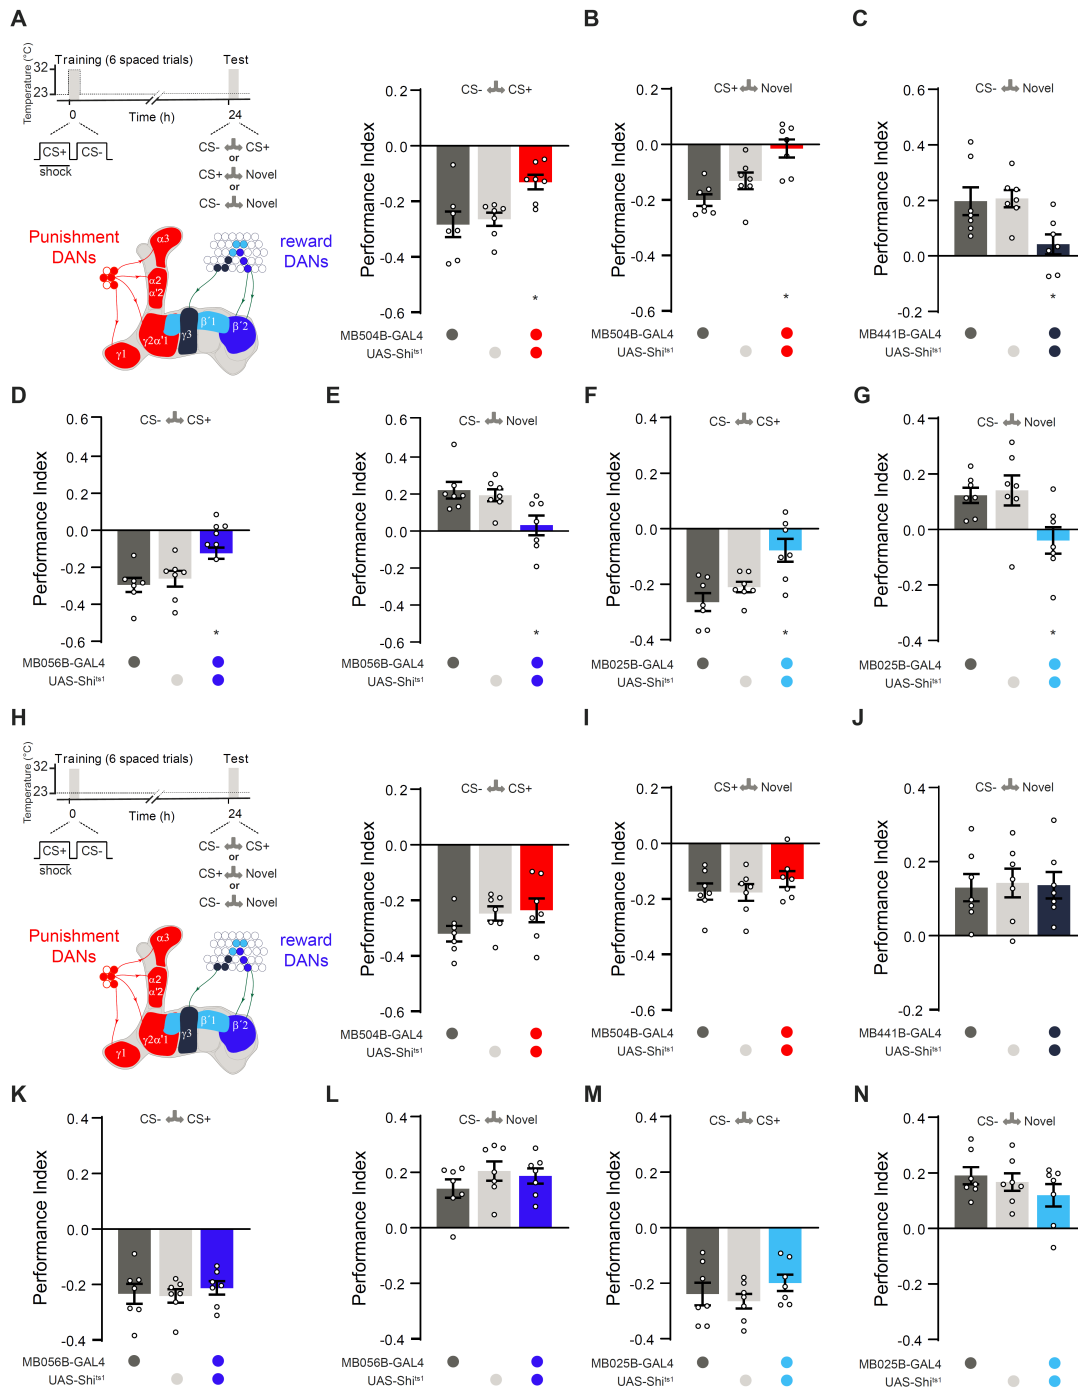

**Figure S5. Related to Figure 5.**

**Blocking specific dopaminergic neurons during spaced training localises discrete sites of aversive and safety memory.**

GAL4 driver and temperature control experiments for data presented in Figure 5. **(A)** Left: protocol with temperature shifting (dashed line) and color-coded illustration of DANs labelled with each GAL4. Right: blocking PPL1-DANs during spaced training with MB504B-GAL4; UAS-Shi<sup>ts1</sup> impaired 24 h memory and **(B)** CS+ aversive memory (CS+ vs. Novel). **(C)** CS- approach memory was impaired with PAM- $\gamma 3$  block. **(D)** Blocking PAM- $\beta 2$ mp impaired 24 h memory and **(E)** CS- approach memory. **(F)** Blocking PAM- $\beta 1$  impaired 24 h memory and

(G) CS- approach memory. (H) Left: protocol (dashed line) and color-coded illustration of DANs labelled with each GAL4. Right: Expressing UAS-*Shi*<sup>ts1</sup> in PPL1-DANs (MB504B-GAL4) did not disrupt 24 h memory after spaced training at permissive 23°C. (I) CS+ aversive memory was also unaffected. (J) CS- approach memory was unaffected for MB441B-GAL4; UAS-*Shi*<sup>ts1</sup>(PAM-γ3) flies at permissive 23°C. (K) At permissive 23°C, 24 h memory of MB056B-GAL4; UAS-*Shi*<sup>ts1</sup> (PAM-β'2mp) flies was unaffected, as was (L) MB056B-GAL4; UAS-*Shi*<sup>ts1</sup> CS- approach memory, (M) MB025B-GAL4; UAS-*Shi*<sup>ts1</sup> (PAM-β'1) 24 h memory, and (N) MB025B-GAL4; UAS-*Shi*<sup>ts1</sup> CS- approach memory. Asterisks denote significant differences. Data mean ± SEM. Individual data points displayed as dots. See Table S1 for statistics.

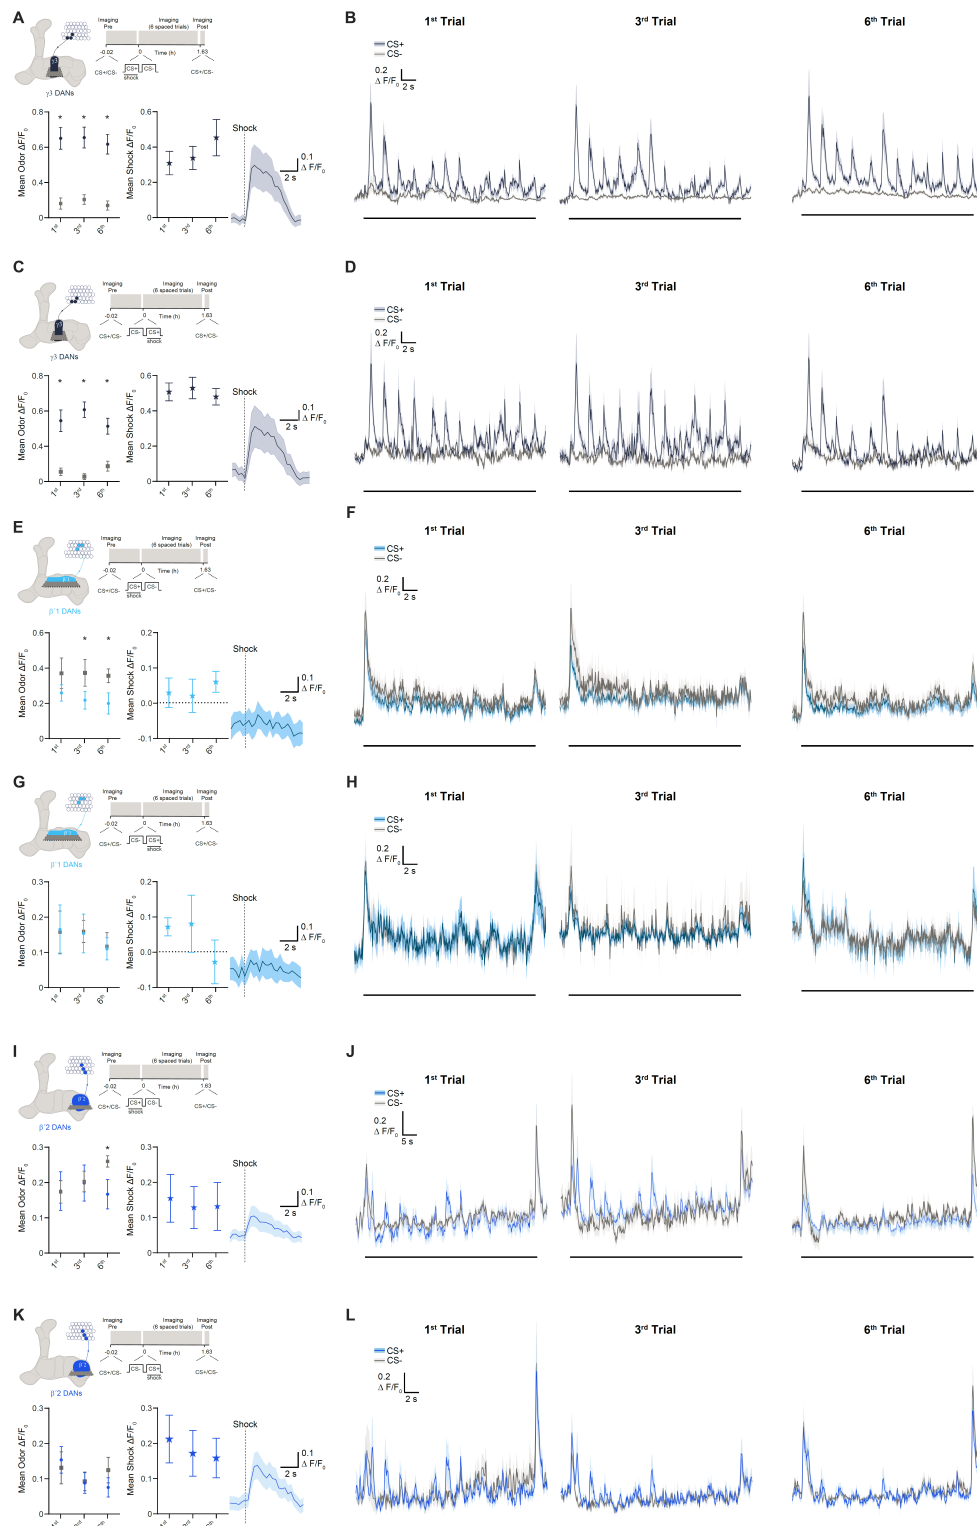

**Figure S6. Related to Figure 6.**

**Spaced training enhanced CS+ responses in aversive  $\gamma$ 3 DANs and CS- responses in rewarding  $\beta$ '1 and  $\beta$ '2mp DANs.**

(A and C) Top: Imaging plane in the presynaptic field of  $\gamma$ 3 DANs and training and imaging protocol. (A) Bottom left panel: From the 1<sup>st</sup> training trial the CS+ showed an increased



mean response relative to the CS-. This was also observed during reversed spaced training (C). (A and C) Bottom right panels:  $\gamma 3$  DANs showed a strong calcium response to electric shock. (B and D) Calcium responses during the 1<sup>st</sup>, 3<sup>rd</sup> and 6<sup>th</sup> training trials. Odor-evoked activity traces show mean (solid line) with SEM (shadow). Black line underneath, 60 s odor. (E) Top: Imaging plane in the presynaptic field of  $\beta'1$  DANs and training and imaging protocol. Bottom left: From the 3<sup>rd</sup> training trial CS- responses were increased relative to CS+ responses. Bottom right:  $\beta'1$  DANs did not respond to shock with an increase in calcium. (F) Calcium responses during the 1<sup>st</sup>, 3<sup>rd</sup> and 6<sup>th</sup> trials of spaced training. Horizontal line denotes odor stimulus. (G) Top: Imaging plane in the presynaptic field of  $\beta'1$  DANs and training and imaging protocol. Bottom left: No differences between the CS+ and CS- responses were observed during reversed spaced training. Bottom right:  $\beta'1$  DANs did not respond to shock with an increase in calcium. (H) Calcium responses during the 1<sup>st</sup>, 3<sup>rd</sup> and 6<sup>th</sup> trials of reversed spaced training. Horizontal line denotes odor stimulus. (I) Top: Imaging plane in the presynaptic field of  $\beta'2mp$  DANs and training and imaging protocol. Bottom left: At the 6<sup>th</sup> training trial, the CS- evoked an increased mean response (over the 60 s of odor presentation) in comparison to the CS+, but not for the other trials analyzed. Bottom right: Aligning the activity of  $\beta'2mp$  DANs to time of each of the 12 shocks (dashed line) reveals a shock-evoked response. Calcium responses were calculated by averaging the fluorescence over the 3 s following each shock. (J)  $\beta'2mp$  DAN calcium responses during the 1<sup>st</sup>, 3<sup>rd</sup> and 6<sup>th</sup> trials of spaced training. Horizontal line denotes odor stimulus. (K) Top: Imaging plane in presynaptic field of  $\beta'2mp$  DANs and training and imaging protocol. Bottom left: No changes were observed between CS+ and CS- responses during reversed spaced training. Bottom right:  $\beta'2mp$  DANs responded to shock. (L)  $\beta'2mp$  DAN calcium responses during the 1<sup>st</sup>, 3<sup>rd</sup> and 6<sup>th</sup> trial of reversed spaced training. Horizontal line denotes odor stimulus. CS+ data corresponds to average data in which 50% of trials used MCH as CS+ and 50% were OCT CS+. Same applies for CS- data. Asterisks denote significant difference between averaged CS+ and CS- responses. See Table S1 for statistics.

**Table S1. Statistical details. Related to Figures 1-6 and S1-S6.**

| Figure                                                                 | Experiment                                                                                                                                                   | n                                                     | Normally distributed | Statistical test                    | p value                             |          |
|------------------------------------------------------------------------|--------------------------------------------------------------------------------------------------------------------------------------------------------------|-------------------------------------------------------|----------------------|-------------------------------------|-------------------------------------|----------|
| Figure 1A                                                              | CS+ memory (CS+ vs Novel) vs. LTM (CS+ vs CS-); spaced training                                                                                              | 8-13                                                  | yes                  | unpaired t-test t(19)=2.890         | p=0.0094                            |          |
|                                                                        | CS- vs Novel; spaced training                                                                                                                                | 10                                                    | yes                  | one sample t-test t(9)=3.312        | p=0.0091                            |          |
| Figure 1B                                                              | CS+ memory (CS+ vs Novel) vs. LTM (CS+ vs CS-); reversed spaced training                                                                                     | 8-11                                                  | yes                  | unpaired t-test t(17)=0.6628        | p=0.5163                            |          |
|                                                                        | Performance of CS- vs Novel different from zero; reversed spaced training                                                                                    | 8                                                     | yes                  | one sample t-test t(7)=1.546        | p=0.1660                            |          |
| Figure 1C                                                              | CS+ memory (CS+ vs Novel) vs. LTM (CS+ vs CS-); massed training                                                                                              | 10-15                                                 | yes                  | unpaired t-test t(23)=0.7649        | p=0.4521                            |          |
|                                                                        | Performance of CS- vs Novel different from zero; massed training                                                                                             | 10                                                    | yes                  | one sample t-test t(9)=1.151        | p=0.2792                            |          |
| Figure 1D                                                              | CS+ memory (CS+ vs Novel) vs. LTM (CS+ vs CS-); fasting LTM protocol                                                                                         | 10-11                                                 | yes                  | unpaired t-test t(19)=1.802         | p=0.09                              |          |
|                                                                        | Performance of CS- vs Novel different from zero; fasting LTM protocol                                                                                        | 10                                                    | yes                  | one sample t-test t(9)=0.4190       | p=0.6850                            |          |
| Figure 1E                                                              | Time-line of CS+ vs. CS- memory (all time points)                                                                                                            | 8-10                                                  | yes                  | F[5,44]=20.61                       | p<0.0001                            |          |
|                                                                        | Immediate vs. 24 h                                                                                                                                           |                                                       |                      | Dunnett's multiple comparisons test | p=0.0011                            |          |
|                                                                        | 30 min vs. 24 h                                                                                                                                              |                                                       |                      |                                     | p=0.0122                            |          |
|                                                                        | 3 h vs. 24 h                                                                                                                                                 |                                                       |                      |                                     | p=0.0043                            |          |
|                                                                        | 14 h vs. 24 h                                                                                                                                                |                                                       |                      |                                     | p=0.9998                            |          |
|                                                                        | 96 h vs. 24 h                                                                                                                                                |                                                       |                      |                                     | p=0.0028                            |          |
| Figure 1F                                                              | Time-line of CS- vs. Novel (all time points)                                                                                                                 | 8-10                                                  | yes                  | F[5,44]=4.33                        | p=0.0028                            |          |
|                                                                        | Immediate vs. 24h                                                                                                                                            |                                                       |                      | Dunnett's multiple comparisons test | p=0.0026                            |          |
|                                                                        | 30 min vs. 24 h                                                                                                                                              |                                                       |                      |                                     | p=0.047                             |          |
|                                                                        | 3 h vs. 24 h                                                                                                                                                 |                                                       |                      |                                     | p=0.3717                            |          |
|                                                                        | 14 h vs. 24 h                                                                                                                                                |                                                       |                      |                                     | p=0.9997                            |          |
|                                                                        | 96 h vs. 24 h                                                                                                                                                |                                                       |                      |                                     | p=0.8464                            |          |
|                                                                        | Performance of CS- vs. Novel different from zero @ Immediate time point                                                                                      | 8                                                     | yes                  | one sample t-test t(7)=0.6530       | p=0.5346                            |          |
|                                                                        | Performance of CS- vs. Novel different from zero @ 30 min time point                                                                                         | 8                                                     |                      | one sample t-test t(7)=0.9635       | p=0.3674                            |          |
|                                                                        | Performance of CS- vs. Novel different from zero @ 3 h time point                                                                                            | 8                                                     |                      | one sample t-test t(7)=1.931        | p=0.0948                            |          |
|                                                                        | Performance of CS- vs. Novel different from zero @ 14 h time point                                                                                           | 8                                                     |                      | one sample t-test t(7)=5.557        | p<0.0001                            |          |
|                                                                        | Performance of CS- vs. Novel different from zero @ 24 h time point                                                                                           | 8                                                     |                      | one sample t-test t(7)= 9.305       | p=0.0009                            |          |
|                                                                        | Performance of CS- vs. Novel different from zero @ 96 h time point                                                                                           | 10                                                    |                      | one sample t-test t(9)= 2.885       | p=0.0180                            |          |
|                                                                        | Figure 1G                                                                                                                                                    | Time-line of CS+ vs. Novel (all time points)          | 8-10                 | yes                                 | F[5,44]=20.61                       | p<0.0001 |
|                                                                        |                                                                                                                                                              | Immediate vs. 24h                                     |                      |                                     | Dunnett's multiple comparisons test | p=0.0011 |
|                                                                        |                                                                                                                                                              | 30 min vs. 24 h                                       |                      |                                     |                                     | p=0.0122 |
|                                                                        |                                                                                                                                                              | 3 h vs. 24 h                                          |                      |                                     |                                     | p=0.0043 |
| 14 h vs. 24 h                                                          |                                                                                                                                                              | p=0.9921                                              |                      |                                     |                                     |          |
| 96 h vs. 24 h                                                          |                                                                                                                                                              | p=0.0028                                              |                      |                                     |                                     |          |
| Performance of CS- vs. Novel different from zero @ Immediate timepoint |                                                                                                                                                              | 10                                                    | yes                  | one sample t-test t(9)=0.1127       | p=0.9219                            |          |
| Figure 1G                                                              |                                                                                                                                                              | rad vs. WT; spaced training LTM (CS+ vs CS-)          | 7                    | yes                                 | unpaired t-test t(12)=2.225         | p=0.0416 |
|                                                                        |                                                                                                                                                              | rad vs. WT; spaced training CS+ memory (CS+ vs Novel) | 8                    | yes                                 | unpaired t-test t(14)=2.969         | p=0.0102 |
|                                                                        |                                                                                                                                                              | rad vs. WT; spaced training CS- memory (CS- vs Novel) | 7                    | yes                                 | unpaired t-test t(12)=0.2593        | p=0.7998 |
| Figure 1G                                                              | CXM vs. WT; spaced training LTM (CS+ vs CS-)                                                                                                                 | 7-8                                                   | yes                  | unpaired test t(13)=3.943           | p=0.0017                            |          |
|                                                                        | CXM vs. WT; spaced training CS+ memory (CS+ vs Novel)                                                                                                        | 9-12                                                  | yes                  | unpaired t-test t(19)=2.703         | p=0.0141                            |          |
|                                                                        | CXM vs. WT; spaced training CS- memory (CS- vs Novel)                                                                                                        | 11-13                                                 | yes                  | unpaired t-test t(22)=1.720         | p=0.0995                            |          |
| Figure 2A                                                              | LTM performance (CS+ vs CS-); PAM block R58E02-GAL4; UAS-Sh <sup>ts1</sup> vs. +; UAS-Sh <sup>ts1</sup>                                                      | 14-15                                                 | yes                  | F[2,41]=24.93                       | p<0.0001                            |          |
|                                                                        | R58E02-GAL4; UAS-Sh <sup>ts1</sup> vs. R58E02-GAL4; + R58E02-GAL4; + vs. +; UAS-Sh <sup>ts1</sup>                                                            |                                                       |                      | Tukey's multiple comparisons test   | p<0.0001                            |          |
|                                                                        |                                                                                                                                                              |                                                       |                      |                                     | p=0.4404                            |          |
| Figure 2B                                                              | CS+ memory (CS+ vs Novel); PAM block                                                                                                                         | 6                                                     | yes                  | F[2,15]=0.59                        | p=0.5668                            |          |
| Figure 2C                                                              | CS- memory (CS- vs Novel); PAM block R58E02-GAL4; UAS-Sh <sup>ts1</sup> vs. +; UAS-Sh <sup>ts1</sup>                                                         | 7-8                                                   | yes                  | F[2,19]=26.32                       | p<0.0001                            |          |
|                                                                        | R58E02-GAL4; UAS-Sh <sup>ts1</sup> vs. R58E02-GAL4; + R58E02-GAL4; + vs. +; UAS-Sh <sup>ts1</sup>                                                            |                                                       |                      | Tukey's multiple comparisons test   | p<0.0001                            |          |
|                                                                        |                                                                                                                                                              |                                                       |                      |                                     | p=0.0002                            |          |
| Figure 2D                                                              | LTM performance (CS+ vs CS-); PAM block during the 1 <sup>st</sup> and 2 <sup>nd</sup> trial R58E02-GAL4; UAS-Sh <sup>ts1</sup> vs. +; UAS-Sh <sup>ts1</sup> | 8                                                     | yes                  | F[2,21]=11.40                       | p=0.0004                            |          |
|                                                                        | R58E02-GAL4; UAS-Sh <sup>ts1</sup> vs. R58E02-GAL4; + R58E02-GAL4; + vs. +; UAS-Sh <sup>ts1</sup>                                                            |                                                       |                      | Tukey's multiple comparisons test   | p=0.0013                            |          |
|                                                                        |                                                                                                                                                              |                                                       |                      |                                     | p=0.0014                            |          |
| Figure 2E                                                              | LTM performance (CS+ vs CS-); PAM block during the 3 <sup>rd</sup> and 4 <sup>th</sup> trial R58E02-GAL4; UAS-Sh <sup>ts1</sup> vs. +; UAS-Sh <sup>ts1</sup> | 8                                                     | yes                  | F[2,21]=9.209                       | p=0.0004                            |          |
|                                                                        | R58E02-GAL4; UAS-Sh <sup>ts1</sup> vs. R58E02-GAL4; + R58E02-GAL4; + vs. +; UAS-Sh <sup>ts1</sup>                                                            |                                                       |                      | Tukey's multiple comparisons test   | p=0.0272                            |          |
|                                                                        |                                                                                                                                                              |                                                       |                      |                                     | p=0.0011                            |          |
| Figure 2F                                                              | LTM performance (CS+ vs CS-); PAM block during the 5 <sup>th</sup> and 6 <sup>th</sup> trial R58E02-GAL4; UAS-Sh <sup>ts1</sup> vs. +; UAS-Sh <sup>ts1</sup> | 8                                                     | yes                  | F[2,21]=7.741                       | p=0.003                             |          |
|                                                                        | R58E02-GAL4; UAS-Sh <sup>ts1</sup> vs. R58E02-GAL4; + R58E02-GAL4; + vs. +; UAS-Sh <sup>ts1</sup>                                                            |                                                       |                      | Tukey's multiple comparisons test   | p=0.0083                            |          |
|                                                                        |                                                                                                                                                              |                                                       |                      |                                     | p=0.0062                            |          |
|                                                                        |                                                                                                                                                              |                                                       |                      |                                     | p=0.9916                            |          |

|           |                                                                                                                                                                                                                                                                                                                                                                             |       |     |                                              |          |
|-----------|-----------------------------------------------------------------------------------------------------------------------------------------------------------------------------------------------------------------------------------------------------------------------------------------------------------------------------------------------------------------------------|-------|-----|----------------------------------------------|----------|
| Figure 3A | R71D08-GAL4 after spaced training                                                                                                                                                                                                                                                                                                                                           | 28    | yes | paired t-test t(27)=4.277                    | p=0.0002 |
| Figure 3B | G0239-GAL4 after spaced training                                                                                                                                                                                                                                                                                                                                            | 20    | no  | Wilcoxon matched-pairs signed rank W(19)=169 | p<0.0001 |
| Figure 3C | R39A05-GAL4 after spaced training, dendrites                                                                                                                                                                                                                                                                                                                                | 28    | yes | paired t-test t(27)=3.374                    | p=0.023  |
| Figure 3D | R39A05-GAL4 after spaced training reverse order, dendrites                                                                                                                                                                                                                                                                                                                  | 24    | yes | paired t-test t(23)=0.19                     | p=0.851  |
| Figure 3E | R39A05-GAL4 after spaced training, presynaptic terminals                                                                                                                                                                                                                                                                                                                    | 34    | yes | paired t-test t(33)=2.639                    | p=0.013  |
| Figure 3F | R39A05-GAL4 after spaced training reverse order, presynaptic terminals                                                                                                                                                                                                                                                                                                      | 24    | yes | paired t-test t(23)=0.1181                   | P=0.118  |
| Figure 3G | R66C08-GAL4 after spaced training, dendrites                                                                                                                                                                                                                                                                                                                                | 20    | yes | paired t-test t(19)=0.1799                   | p=0.8591 |
| Figure 3H | R66C08-GAL4 after spaced training reverse order, dendrites                                                                                                                                                                                                                                                                                                                  | 20    | yes | paired t-test t(19)=0.03199                  | p=0.9748 |
| Figure 4A | MB110C-GAL4 after spaced training, $\beta$ 1 dendrites                                                                                                                                                                                                                                                                                                                      | 34    | yes | paired t-test t(33)=3.793                    | p=0.0006 |
| Figure 4B | MB110C-GAL4 after spaced training reverse order, $\beta$ 1 dendrites                                                                                                                                                                                                                                                                                                        | 30    | no  | Wilcoxon matched-pairs signed rank W(29)=31  | p=0.749  |
| Figure 4C | MB110C-GAL4 after spaced training, $\gamma$ 3 dendrites                                                                                                                                                                                                                                                                                                                     | 36    | no  | Wilcoxon matched-pairs signed rank W(35)=308 | p=0.011  |
| Figure 4D | MB110C-GAL4 after spaced training reverse order, $\gamma$ 3 dendrites                                                                                                                                                                                                                                                                                                       | 30    | yes | paired t-test t(29)=2.140                    | p=0.04   |
| Figure 4E | MB110C-GAL4 after spaced training, presynaptic terminals                                                                                                                                                                                                                                                                                                                    | 34    | yes | paired t-test t(33)=0.1275                   | p=0.899  |
| Figure 4F | MB110C-GAL4 after spaced training reverse order, presynaptic terminals                                                                                                                                                                                                                                                                                                      | 22    | yes | paired t-test t(21)=1.535                    | p=0.14   |
| Figure 5A | LTM performance (CS+ vs CS-); DAN block MB504B-GAL4; UAS- <i>Shi</i> <sup>fs1</sup> vs.+; UAS- <i>Shi</i> <sup>fs1</sup> MB441B-GAL4; UAS- <i>Shi</i> <sup>fs1</sup> vs.+; UAS- <i>Shi</i> <sup>fs1</sup> MB056B-GAL4; UAS- <i>Shi</i> <sup>fs1</sup> vs.+; UAS- <i>Shi</i> <sup>fs1</sup> MB025B-GAL4; UAS- <i>Shi</i> <sup>fs1</sup> vs.+; UAS- <i>Shi</i> <sup>fs1</sup> | 11-13 | yes | F[4,53]=5.093                                | p=0.0015 |
|           |                                                                                                                                                                                                                                                                                                                                                                             |       |     | Dunnett's multiple comparisons test          | p=0.0024 |
|           |                                                                                                                                                                                                                                                                                                                                                                             |       |     |                                              | p=0.8683 |
|           |                                                                                                                                                                                                                                                                                                                                                                             |       |     |                                              | p=0.0055 |
|           |                                                                                                                                                                                                                                                                                                                                                                             |       |     |                                              | p=0.0429 |
| Figure 5B | CS+ memory (CS+ vs Novel); DAN block MB504B-GAL4; UAS- <i>Shi</i> <sup>fs1</sup> vs.+; UAS- <i>Shi</i> <sup>fs1</sup> MB441B-GAL4; UAS- <i>Shi</i> <sup>fs1</sup> vs.+; UAS- <i>Shi</i> <sup>fs1</sup> MB056B-GAL4; UAS- <i>Shi</i> <sup>fs1</sup> vs.+; UAS- <i>Shi</i> <sup>fs1</sup> MB025B-GAL4; UAS- <i>Shi</i> <sup>fs1</sup> vs.+; UAS- <i>Shi</i> <sup>fs1</sup>    | 8-9   | yes | F[4,37]=3.371                                | p=0.0189 |
|           |                                                                                                                                                                                                                                                                                                                                                                             |       |     | Dunnett's multiple comparisons test          | p=0.0362 |
|           |                                                                                                                                                                                                                                                                                                                                                                             |       |     |                                              | p=0.9663 |
|           |                                                                                                                                                                                                                                                                                                                                                                             |       |     |                                              | p=0.9992 |
|           |                                                                                                                                                                                                                                                                                                                                                                             |       |     |                                              | p=0.9997 |
| Figure 5C | CS- memory (CS- vs Novel); DAN block MB504B-GAL4; UAS- <i>Shi</i> <sup>fs1</sup> vs.+; UAS- <i>Shi</i> <sup>fs1</sup> MB441B-GAL4; UAS- <i>Shi</i> <sup>fs1</sup> vs.+; UAS- <i>Shi</i> <sup>fs1</sup> MB056B-GAL4; UAS- <i>Shi</i> <sup>fs1</sup> vs.+; UAS- <i>Shi</i> <sup>fs1</sup> MB025B-GAL4; UAS- <i>Shi</i> <sup>fs1</sup> vs.+; UAS- <i>Shi</i> <sup>fs1</sup>    | 8     | yes | F[4,335]=11.76                               | p<0.0001 |
|           |                                                                                                                                                                                                                                                                                                                                                                             |       |     | Dunnett's multiple comparisons test          | p=0.8466 |
|           |                                                                                                                                                                                                                                                                                                                                                                             |       |     |                                              | p=0.0002 |
|           |                                                                                                                                                                                                                                                                                                                                                                             |       |     |                                              | p=0.0007 |
|           |                                                                                                                                                                                                                                                                                                                                                                             |       |     |                                              | p=0.0443 |
| Figure 6B | MB441B-GAL4 after spaced training<br><br>pretraining CS+ vs. pretraining CS-<br>pretraining CS+ vs. posttraining CS+<br>pretraining CS+ vs. posttraining CS-<br>pretraining CS- vs. posttraining CS-                                                                                                                                                                        | 20    | yes | Repeated measures ANOVA, F[19,57]=5.089      | p=0.0102 |
|           |                                                                                                                                                                                                                                                                                                                                                                             |       |     | Bonferroni's multiple comparisons test       | p>0.9999 |
|           |                                                                                                                                                                                                                                                                                                                                                                             |       |     |                                              | p=0.0388 |
|           |                                                                                                                                                                                                                                                                                                                                                                             |       |     |                                              | p=0.0001 |
|           |                                                                                                                                                                                                                                                                                                                                                                             |       |     |                                              | p>0.9999 |
| Figure 6D | MB441B-GAL4 after reversed spaced training<br><br>pretraining CS+ vs. pretraining CS-<br>pretraining CS+ vs. posttraining CS+<br>pretraining CS+ vs. posttraining CS-<br>pretraining CS- vs. posttraining CS-                                                                                                                                                               | 20    | yes | Repeated measures ANOVA, F[19,57]=6.417      | p=0.0066 |
|           |                                                                                                                                                                                                                                                                                                                                                                             |       |     | Bonferroni's multiple comparisons test       | p>0.9999 |
|           |                                                                                                                                                                                                                                                                                                                                                                             |       |     |                                              | p<0.0001 |
|           |                                                                                                                                                                                                                                                                                                                                                                             |       |     |                                              | P=0.0406 |
|           |                                                                                                                                                                                                                                                                                                                                                                             |       |     |                                              | p>0.9999 |
| Figure 6F | MB025B-GAL4 after spaced training<br><br>pretraining CS+ vs. pretraining CS-<br>pretraining CS+ vs. posttraining CS+<br>pretraining CS+ vs. posttraining CS-<br>pretraining CS- vs. posttraining CS-                                                                                                                                                                        | 20    | yes | Repeated measures ANOVA, F[19,57]= 5.244     | p=0.0066 |
|           |                                                                                                                                                                                                                                                                                                                                                                             |       |     | Bonferroni's multiple comparisons test       | p=0.6615 |
|           |                                                                                                                                                                                                                                                                                                                                                                             |       |     |                                              | p=0.0254 |
|           |                                                                                                                                                                                                                                                                                                                                                                             |       |     |                                              | p=0.0019 |
|           |                                                                                                                                                                                                                                                                                                                                                                             |       |     |                                              | p=0.2918 |
| Figure 6H | MB025B-GAL4 after reversed spaced training<br><br>pretraining CS+ vs. pretraining CS-<br>pretraining CS+ vs. posttraining CS+<br>pretraining CS+ vs. posttraining CS-<br>pretraining CS- vs. posttraining CS-                                                                                                                                                               | 20    | yes | Repeated measures ANOVA, F[19,57]= 6.063     | p=0.0045 |
|           |                                                                                                                                                                                                                                                                                                                                                                             |       |     | Bonferroni's multiple comparisons test       | p=0.1846 |
|           |                                                                                                                                                                                                                                                                                                                                                                             |       |     |                                              | p=0.0048 |
|           |                                                                                                                                                                                                                                                                                                                                                                             |       |     |                                              | p>0.9999 |
|           |                                                                                                                                                                                                                                                                                                                                                                             |       |     |                                              | p=0.045  |
| Figure 6J | MB056B-GAL4 after spaced training<br><br>pretraining CS+ vs. pretraining CS-<br>pretraining CS+ vs. posttraining CS+<br>pretraining CS+ vs. posttraining CS-<br>pretraining CS- vs. posttraining CS-                                                                                                                                                                        | 20    | yes | Repeated measures ANOVA, F[19,57]=8.042      | p=0.0012 |
|           |                                                                                                                                                                                                                                                                                                                                                                             |       |     | Bonferroni's multiple comparisons test       | p=0.5877 |
|           |                                                                                                                                                                                                                                                                                                                                                                             |       |     |                                              | p>0.9999 |
|           |                                                                                                                                                                                                                                                                                                                                                                             |       |     |                                              | p=0.0276 |
|           |                                                                                                                                                                                                                                                                                                                                                                             |       |     |                                              | p=0.0041 |
| Figure 6L | MB056B-GAL4 after reversed spaced training                                                                                                                                                                                                                                                                                                                                  | 20    | yes | Repeated measures ANOVA, F[19,57]=1.306      | p=0.283  |

|                                                                          |                                                                                                                   |          |     |                                   |          |
|--------------------------------------------------------------------------|-------------------------------------------------------------------------------------------------------------------|----------|-----|-----------------------------------|----------|
| Figure S1A                                                               | CS+ vs. Air; different training regimens                                                                          | 8        | yes | F[2,21]=0.4275                    | p=0.65   |
| Figure S1B                                                               | CS- vs. Air; different training regimens                                                                          | 10       | yes | F[2,27]=7.609                     | p=0.0024 |
|                                                                          | spaced vs. reversed spaced                                                                                        |          |     | Tukey's multiple comparisons test | p=0.0021 |
|                                                                          | spaced vs. massed                                                                                                 |          |     |                                   | p=0.0313 |
|                                                                          | reversed spaced vs. massed                                                                                        |          |     |                                   | p=0.5231 |
|                                                                          | Performance of CS- vs. Air different from zero; spaced training                                                   |          |     | one sample t-test t(9)=2.375      | p=0.0416 |
| Performance of CS- vs. Air different from zero; reversed spaced training | one sample t-test t(9)=2.511                                                                                      | p=0.0332 |     |                                   |          |
| Performance of CS- vs. Air different from zero; massed training          | one sample t-test t(9)=2.595                                                                                      | p=0.0290 |     |                                   |          |
| Figure S1C                                                               | Performance of CS+ vs. CS- (LTM) different from zero; massed training 96 h                                        | 7        | yes | one sample t-test t(6)=1.434      | p=0.2016 |
|                                                                          | Performance of CS+ vs. Novel different from zero; massed training 96 h                                            |          |     | one sample t-test t(6)=0.3854     | p=0.7133 |
|                                                                          | Performance of CS- vs. Novel different from zero; massed training 96 h                                            |          |     | one sample t-test t(6)=1.142      | p=0.2969 |
| Figure S1D                                                               | Performance of spaced relief training 45 s ITI different from zero                                                | 8        | yes | one-sample t-test t(7)=5.191      | p=0.0013 |
|                                                                          | Performance of spaced relief training 90 s ITI different from zero                                                |          |     | one-sample t-test t(7)=2.425      | p=0.0411 |
|                                                                          | Performance of spaced relief training 135 s ITI different from zero                                               |          |     | one-sample t-test t(7)=1.597      | p=0.1543 |
| Figure S1E                                                               | LTM (CS+ vs CS-) performance with varying ITI                                                                     | 12       | yes | F[3,44]=1.228                     | p=0.31   |
| Figure S1F                                                               | CS- memory (CS- vs Novel)                                                                                         | 11       | yes | F[3,40]=1.462                     | p=0.2393 |
| Figure S2A                                                               | LTM performance (CS+ vs CS-); PAM block                                                                           | 14       | yes | F[2,39]=7.229                     | p=0.0021 |
|                                                                          | R58E02-GAL4; UAS-GtACR1 vs.+; UAS-GtACR1                                                                          |          |     | Tukey's multiple comparisons test | p=0.0370 |
|                                                                          | R58E02-GAL4; UAS-GtACR1 vs. R58E02-GAL4; + R58E02-GAL4; + vs.+; UAS-GtACR1                                        |          |     |                                   | p=0.0018 |
| Figure S2B                                                               | LTM performance (CS+ vs CS-); PAM block (light controls)                                                          | 8        | yes | F[2,21]=0.2825                    | p=0.7567 |
| Figure S2C                                                               | LTM performance (CS+ vs CS-); PAM block (temperature controls)                                                    | 6        | yes | F[2,15]=1.605                     | p=0.2335 |
| Figure S2D                                                               | CS+ memory (CS+ vs Novel); PAM block (temperature controls)                                                       | 6        | yes | F[2,15]=1.132                     | p=0.3484 |
| Figure S2E                                                               | CS- memory (CS- vs Novel); PAM block (temperature controls)                                                       | 6        | yes | F[2,15]=0.3142                    | p=0.7351 |
| Figure S2F                                                               | LTM performance (CS+ vs CS-); PAM block during the 4 <sup>th</sup> trial                                          | 7        | yes | F[2,18]=0.9606                    | p=0.4014 |
| Figure S2G                                                               | LTM performance (CS+ vs CS-); PAM block during the 6 <sup>th</sup> trial                                          | 8        | yes | F[2,21]=0.5720                    | p=0.5729 |
| Figure S3A                                                               | R66C08-GAL4 after spaced training, presynaptic terminals                                                          | 24       | yes | paired t-test t(23)=1.815         | p=0.0825 |
| Figure S3B                                                               | R66C08-GAL4 after spaced training reverse order, presynaptic terminals                                            | 18       | yes | paired t-test t(17)=1.464         | p=0.1615 |
| Figure S4A                                                               | CS+ memory (CS+ vs Novel); $\gamma 3$ , $\gamma 3\beta 1$ MBONs block                                             | 8        | yes | F[2,21]=0.4088                    | p=0.6696 |
| Figure S4B                                                               | CS- memory (CS- vs Novel); $\gamma 3$ , $\gamma 3\beta 1$ MBONs block                                             | 7        | yes | F[2,18]=7.316                     | p=0.0047 |
|                                                                          | +; MB110C-GAL4/UAS- <i>Shi<sup>fs1</sup></i> vs.+; UAS- <i>Shi<sup>fs1</sup></i>                                  |          |     | Tukey's multiple comparisons test | p=0.0042 |
|                                                                          | +; MB110C-GAL4/UAS- <i>Shi<sup>fs1</sup></i> vs.+; MB110C-GAL4 +; MB110C-GAL4 vs.+; UAS- <i>Shi<sup>fs1</sup></i> |          |     |                                   | p=0.0431 |
| Figure S5A                                                               | LTM performance (CS+ vs CS-); PPL1-DAN block                                                                      | 7        | yes | F[2,18]=6.134                     | p=0.0093 |
|                                                                          | MB504B-GAL4; UAS- <i>Shi<sup>fs1</sup></i> vs.+; UAS- <i>Shi<sup>fs1</sup></i>                                    |          |     | Tukey's multiple comparisons test | p=0.0290 |
|                                                                          | MB504B-GAL4; UAS- <i>Shi<sup>fs1</sup></i> vs. MB504B-GAL4; + MB504B-GAL4; + vs.+; UAS- <i>Shi<sup>fs1</sup></i>  |          |     |                                   | p=0.0129 |
| Figure S5B                                                               | CS+ memory (CS+ vs Novel); PPL1-DAN block                                                                         | 7        | yes | F[2,18]=10.99                     | p=0.0008 |
|                                                                          | MB504B-GAL4; UAS- <i>Shi<sup>fs1</sup></i> vs.+; UAS- <i>Shi<sup>fs1</sup></i>                                    |          |     | Tukey's multiple comparisons test | p=0.0237 |
|                                                                          | MB504B-GAL4; UAS- <i>Shi<sup>fs1</sup></i> vs. MB504B-GAL4; + MB504B-GAL4; + vs.+; UAS- <i>Shi<sup>fs1</sup></i>  |          |     |                                   | p=0.0006 |
| Figure S5C                                                               | CS- memory (CS- vs Novel); PAM- $\gamma 3$ DAN block                                                              | 7        | yes | F[2,18]=5.393                     | p=0.0146 |
|                                                                          | MB441B-GAL4; UAS- <i>Shi<sup>fs1</sup></i> vs.+; UAS- <i>Shi<sup>fs1</sup></i>                                    |          |     | Tukey's multiple comparisons test | p=0.0233 |
|                                                                          | MB441B-GAL4; UAS- <i>Shi<sup>fs1</sup></i> vs. MB441B-GAL4; + MB441B-GAL4; + vs.+; UAS- <i>Shi<sup>fs1</sup></i>  |          |     |                                   | p=0.0334 |
| Figure S5D                                                               | LTM performance (CS+ vs CS-); PAM- $\beta 2$ mp DAN block                                                         | 7        | yes | F[2,18]=5.855                     | p=0.0110 |
|                                                                          | MB056B-GAL4; UAS- <i>Shi<sup>fs1</sup></i> vs.+; UAS- <i>Shi<sup>fs1</sup></i>                                    |          |     | Tukey's multiple comparisons test | p=0.0463 |
|                                                                          | MB056B-GAL4; UAS- <i>Shi<sup>fs1</sup></i> vs. MB056B-GAL4; + MB056B-GAL4; + vs.+; UAS- <i>Shi<sup>fs1</sup></i>  |          |     |                                   | p=0.0122 |
| Figure S5E                                                               | CS- memory (CS- vs Novel); PAM- $\beta 2$ mp DAN block                                                            | 7        | yes | F[2,18]=5.395                     | p=0.0146 |
|                                                                          | MB056B-GAL4; UAS- <i>Shi<sup>fs1</sup></i> vs.+; UAS- <i>Shi<sup>fs1</sup></i>                                    |          |     | Tukey's multiple comparisons test | p=0.0455 |
|                                                                          | MB056B-GAL4; UAS- <i>Shi<sup>fs1</sup></i> vs. MB056B-GAL4; + MB056B-GAL4; + vs.+; UAS- <i>Shi<sup>fs1</sup></i>  |          |     |                                   | p=0.0184 |
| Figure S5F                                                               | LTM performance (CS+ vs CS-); PAM- $\beta 1$ DAN block                                                            | 7        | yes | F[2,18]=8.944                     | p=0.002  |
|                                                                          | MB025B-GAL4; UAS- <i>Shi<sup>fs1</sup></i> vs.+; UAS- <i>Shi<sup>fs1</sup></i>                                    |          |     | Tukey's multiple comparisons test | p=0.0239 |
|                                                                          | MB025B-GAL4; UAS- <i>Shi<sup>fs1</sup></i> vs. MB025B-GAL4; + MB025B-GAL4; + vs.+; UAS- <i>Shi<sup>fs1</sup></i>  |          |     |                                   | p=0.0018 |
| Figure S5G                                                               | CS- memory (CS- vs Novel); PAM- $\beta 1$ DAN block                                                               | 7        | yes | F[2,18]=5                         | p=0.0188 |
|                                                                          | MB025B-GAL4; UAS- <i>Shi<sup>fs1</sup></i> vs.+; UAS- <i>Shi<sup>fs1</sup></i>                                    |          |     | Tukey's multiple comparisons test | p=0.0261 |
|                                                                          | MB025B-GAL4; UAS- <i>Shi<sup>fs1</sup></i> vs. MB025B-GAL4; + MB025B-GAL4; + vs.+; UAS- <i>Shi<sup>fs1</sup></i>  |          |     |                                   | p=0.0472 |
| Figure S5H                                                               | LTM performance (CS+ vs CS-); PPL1-DAN block (temperature controls)                                               | 7        | yes | F[2,18]=1.925                     | p=0.1747 |
| Figure S5I                                                               | CS+ memory (CS+ vs Novel); PPL1-DAN block (temperature controls)                                                  | 7        | yes | F[2,18]=0.8590                    | p=0.4402 |
| Figure S5J                                                               | CS- memory (CS- vs Novel); PAM- $\gamma 3$ DAN block (temperature controls)                                       | 7        | yes | F[2,18]=0.02939                   | p=0.9711 |

|            |                                                                                      |    |     |                                              |          |
|------------|--------------------------------------------------------------------------------------|----|-----|----------------------------------------------|----------|
| Figure S5K | LTM performance (CS+ vs CS-); PAM-β <sup>2</sup> mp DAN block (temperature controls) | 7  | yes | F[2,18]=0.2763                               | p=0.7617 |
| Figure S5L | CS- memory (CS- vs Novel); PAM-β <sup>2</sup> mp DAN block (temperature controls)    | 7  | yes | F[2,18]=1.053                                | p=0.3693 |
| Figure S5M | LTM performance (CS+ vs CS-); PAM-β <sup>1</sup> DAN block (temperature controls)    | 7  | Yes | F[2,18]=1.031                                | p=0.3769 |
| Figure S5N | CS- memory (CS- vs Novel); PAM-β <sup>1</sup> DAN block (temperature controls)       | 7  | yes | F[2,18]=1.064                                | p=0.3658 |
| Figure S6A | MB441B-GAL4 after spaced training CS+ vs CS- response 1 <sup>st</sup> trial          | 20 | yes | paired t-test(19)=3.219                      | p=0.0033 |
|            | MB441B-GAL4 after spaced training CS+ vs CS- response 3 <sup>rd</sup> trial          | 20 | Yes | paired t-test(19)=3.485                      | p=0.0017 |
|            | MB441B-GAL4 after spaced training CS+ vs CS- response 6 <sup>th</sup> trial          | 20 | yes | paired t-test(19)=3.805                      | p=0.0007 |
| Figure S6C | MB441B-GAL4 after reversed spaced training CS+ vs CS- response 1 <sup>st</sup> trial | 20 | yes | paired t-test(19)=4.443                      | p=0.0004 |
|            | MB441B-GAL4 after reversed spaced training CS+ vs CS- response 3 <sup>rd</sup> trial | 20 | Yes | paired t-test(19)=8.27                       | p<0.0001 |
|            | MB441B-GAL4 after reversed spaced training CS+ vs CS- response 6 <sup>th</sup> trial | 20 | yes | paired t-test(19)=3.567                      | p=0.0026 |
| Figure S6E | MB025B-GAL4 after spaced training CS+ vs CS- response 1 <sup>st</sup> trial          | 20 | yes | paired t-test(19)=1.365                      | p=0.1855 |
|            | MB025B-GAL4 after spaced training CS+ vs CS- response 3 <sup>rd</sup> trial          | 20 | Yes | paired t-test(19)=2.161                      | p=0.0414 |
|            | MB025B-GAL4 after spaced training CS+ vs CS- response 6 <sup>th</sup> trial          | 20 | yes | paired t-test(19)=2.172                      | p=0.0404 |
| Figure S6G | MB025B-GAL4 after reversed spaced training CS+ vs CS- response 1 <sup>st</sup> trial | 20 | yes | paired t-test(19)=0.0972                     | p=0.9246 |
|            | MB025B-GAL4 after reversed spaced training CS+ vs CS- response 3 <sup>rd</sup> trial | 20 | Yes | paired t-test(19)=0.0975                     | p=0.9242 |
|            | MB025B-GAL4 after reversed spaced training CS+ vs CS- response 6 <sup>th</sup> trial | 20 | yes | paired t-test(19)=0.2381                     | p=0.8166 |
| Figure S6I | MB056B-GAL4 after spaced training CS+ vs CS- response 1 <sup>st</sup> trial          | 20 | no  | Wilcoxon matched-pairs signed rank W(19)=24  | p=0.8242 |
|            | MB056B-GAL4 after spaced training CS+ vs CS- response 3 <sup>rd</sup> trial          | 20 | no  | Wilcoxon matched-pairs signed rank W(19)=17  | p=0.8968 |
|            | MB056B-GAL4 after spaced training CS+ vs CS- response 6 <sup>th</sup> trial          | 20 | no  | Wilcoxon matched-pairs signed rank W(19)=202 | p=0.0437 |
| Figure S6K | MB056B-GAL4 after reversed spaced training CS+ vs CS- response 1 <sup>st</sup> trial | 20 | no  | Wilcoxon matched-pairs signed rank W(19)=-86 | p=0.4319 |
|            | MB056B-GAL4 after reversed spaced training CS+ vs CS- response 3 <sup>rd</sup> trial | 20 | no  | Wilcoxon matched-pairs signed rank W(19)=20  | p=0.8609 |
|            | MB056B-GAL4 after reversed spaced training CS+ vs CS- response 6 <sup>th</sup> trial | 20 | no  | Wilcoxon matched-pairs signed rank W(19)=184 | p=0.0872 |

**Table S2. Odor and shock acuity tests. Related to Figures 1, 2, 5 and S1, S2, S5.**

| Genotype                              | Odor Acuity |            |            |            |            |            | Shock Acuity |            |
|---------------------------------------|-------------|------------|------------|------------|------------|------------|--------------|------------|
|                                       | 23°C        |            |            | 32°C       |            |            | 23°C         | 32°C       |
|                                       | MCH         | OCT        | IAA        | MCH        | OCT        | IAA        |              |            |
| WT                                    | -0.32±0.06  | -0.30±0.06 | -0.35±0.05 | N.A.       |            |            | -0.65±0.03   | 0.60±0.07  |
| <i>rad</i>                            | -0.34±0.08  | -0.31±0.08 | -0.37±0.09 | N.A.       |            |            | -0.65±0.04   | 0.60±0.03  |
| CXM+                                  | -0.33±0.08  | -0.30±0.06 | -0.30±0.05 | N.A.       |            |            | -0.69±0.03   | 0.60±0.04  |
| CXM-                                  | -0.36±0.07  | -0.37±0.03 | -0.28±0.03 | N.A.       |            |            | -0.65±0.03   | 0.56±0.04  |
| UAS- <i>Shi<sup>ES1</sup></i> /+      | -0.32±0.07  | -0.26±0.03 | -0.28±0.04 | -0.51±0.04 | -0.49±0.03 | -0.39±0.05 | -0.65±0.06   | 0.61±0.04  |
| UAS- <i>Shi<sup>ES1</sup></i> ;R58E02 | -0.28±0.04  | -0.27±0.03 | -0.31±0.04 | -0.40±0.06 | -0.49±0.03 | -0.45±0.04 | -0.65±0.03   | -0.62±0.03 |
| R58E02/+                              | -0.32±0.04  | -0.25±0.03 | -0.30±0.04 | -0.43±0.08 | -0.40±0.05 | -0.39±0.04 | -0.60±0.03   | -0.6±0.04  |
| UAS-GtACR1;R58E02                     | -0.31±0.07  | -0.39±0.06 | -0.29±0.06 | N.A.       |            |            | -0.68±0.04   | N.A.       |
| UAS-GtACR1/+                          | -0.32±0.05  | -0.34±0.04 | -0.35±0.08 | N.A.       |            |            | -0.69±0.05   | N.A.       |
| UAS- <i>Shi<sup>ES1</sup></i> ;MB504B | -0.36±0.03  | -0.29±0.04 | -0.30±0.04 | -0.51±0.03 | -0.41±0.07 | -0.34±0.04 | -0.77±0.05   | 0.63±0.04  |
| UAS- <i>Shi<sup>ES1</sup></i> ;MB056B | -0.33±0.07  | -0.24±0.06 | -0.36±0.06 | -0.44±0.04 | -0.45±0.04 | -0.40±0.04 | -0.78±0.03   | 0.66±0.02  |
| UAS- <i>Shi<sup>ES1</sup></i> ;MB441B | -0.29±0.05  | -0.33±0.03 | -0.33±0.03 | -0.49±0.04 | -0.47±0.05 | -0.34±0.03 | -0.64±0.07   | 0.55±0.02  |
| UAS- <i>Shi<sup>ES1</sup></i> ;MB025B | -0.36±0.03  | -0.37±0.06 | -0.29±0.04 | -0.41±0.05 | -0.51±0.04 | -0.39±0.06 | -0.72±0.05   | 0.7±0.02   |
| MB504B/+                              | -0.30±0.05  | -0.29±0.02 | -0.34±0.06 | -0.46±0.09 | -0.54±0.05 | -0.31±0.07 | -0.68±0.03   | 0.7±0.04   |
| MB056B/+                              | -0.32±0.04  | -0.27±0.05 | -0.31±0.06 | -0.40±0.04 | -0.54±0.05 | -0.37±0.04 | -0.68±0.04   | 0.59±0.04  |
| MB441B/+                              | -0.30±0.02  | -0.29±0.02 | -0.37±0.05 | -0.47±0.04 | -0.47±0.05 | -0.35±0.06 | -0.63±0.05   | 0.56±0.04  |
| MB025B/+                              | -0.31±0.03  | -0.34±0.05 | -0.30±0.03 | -0.44±0.06 | -0.49±0.03 | -0.36±0.04 | -0.67±0.05   | 0.61±0.05  |

There are no statistical differences between the relevant groups. Data is displayed Mean ± SEM and n=7 for all groups.

N.A. not applicable
